# Supplementary material for: Does acetone react with HO 2 in the upper-troposphere?
Source: Copernicus journal article supplement (doi:10.5194/acp-12-1339-2012), 2012-02-02
Supplement: Supplementary file 1 [file acp-12-1339-2012-supplement.zip]

Archive with 2 entries (2 files):
- supp_emac.pdf
- Acetone+HO2_SupportingInformation.pdf
