# Supplementary material for: Does acetone react with HO 2 in the upper-troposphere?
Source: Copernicus journal article supplement (doi:10.5194/acp-12-1339-2012), 2012-02-02
Supplement: Supplementary file 1 [file acp-12-1339-2012-supplement.zip › Acetone+HO2_SupportingInformation.pdf]

# Does acetone react with HO<sub>2</sub> in the upper-troposphere?

T. J. Dillon, A. Pozzer, L. Vereecken, J. N. Crowley, J. Lelieveld

## Uncertainties in the theoretical predictions

As detailed in the main paper, no experimental evidence currently exists that shows HO<sub>2</sub> radicals constitute an important chemical sink for acetone in the atmosphere. The inclusion of this process in atmospheric chemical models, then, relies on the quantum chemical characterization of the reaction process.

### *Summary of reaction scheme and current theoretical data*

The formation of a hydrogen-bonded complex between acetone and HO<sub>2</sub> has been described by several authors (Aloisio et al.,<sup>1</sup> Hermans et al.,<sup>2</sup> Cours et al.<sup>3</sup>) and has been measured by others (Grieman et al.,<sup>4</sup> this work). The stability of the acetone--HO<sub>2</sub> complex ( $\Delta H_r(0K)$  see table 1) was predicted to lie between 34 and 44 kJ mol<sup>-1</sup>, with the most reliable levels of theory agreeing on a value of 40 to 42 kJ mol<sup>-1</sup>, while an spectroscopic van't Hoff analysis by Grieman et al.<sup>4</sup> suggests a  $\Delta H_r(245K)$  of  $-35.4 \pm 2.0$  kJ mol<sup>-1</sup>. The complex formation is a barrierless reaction owing to the long-range attractive forces involved, and proceeds very rapidly to establish an equilibrium between the separated reactants and the complex. As an atmospheric sink for acetone, however, the complex formation is not effective as it does not chemically transform the acetone molecule.

The addition of HO<sub>2</sub> across the carbonyl double bond leads to the formation of  $\alpha$ -OH alkylperoxy radicals (CH<sub>3</sub>)<sub>2</sub>C(OH)OO•; this reaction will typically proceed starting from the pre-reactive H-bonded complex discussed above. The  $\alpha$ -OH alkylperoxy radicals formed can decompose thermally, regenerating the acetone + HO<sub>2</sub> molecules. The energy barrier for decomposition of the intermediate peroxy radicals are predicted to lie between 36 and 50 kJ mol<sup>-1</sup> (see table 2), with the most reliable levels of theory agreeing on a barrier of 46-48 kJ mol<sup>-1</sup>.

Subsequent reaction of the peroxy radical with coreactants such as NO, HO<sub>2</sub> and/or RO<sub>2</sub> will compete with the thermal decomposition of the  $\alpha$ -OH alkylperoxy radicals, the former reactions chemically removing the acetone and providing a sink, while the latter reaction regenerates the acetone+HO<sub>2</sub>. The efficiency of chemical removal depends on the ratio of the pseudo-first order rates of bimolecular removal of the  $\alpha$ -OH alkylperoxy radical versus its thermal decomposition. For the energy barriers predicted for decomposition, thermal decomposition at room temperature is fast, and expected to easily outrun bimolecular reactions. At these temperatures, then, removal by acetone through reaction with HO<sub>2</sub> and subsequent chemical transformation of the  $\alpha$ -OH alkylperoxy radicals is not expected to contribute in the atmosphere. In contrast, at lower temperature, the rate of decomposition of the alkylperoxy radicals is slower, and the likelihood of undergoing a bimolecular reaction increases. For a given concentration of coreactants found in the atmosphere, the removal through bimolecular reactions then depends on the concentration of  $\alpha$ -OH alkylperoxy radicals, or, given that the alkylperoxy radicals can decompose back to acetone+HO<sub>2</sub>, on the equilibrium reaction between acetone + HO<sub>2</sub> with the  $\alpha$ -OH alkylperoxy radicals. A high-pressure thermal equilibrium established between these two sides represents the most favorable situation for competing bimolecular reactions; all effects disturbing this equilibrium (e.g. pressure effects, removal of the adduct radicals at faster rates than their formation, etc.)

lead to lower/depleted concentrations of peroxy radicals, thus lowering the impact of bimolecular reactions, and hence result in a lower contribution of the HO<sub>2</sub> channel as an acetone sink compared to the traditional acetone sinks operating in the atmosphere.

The key parameter in describing the efficiency of the HO<sub>2</sub> pathway as a sink for acetone in the atmosphere is then the equilibrium constant  $K_{eq} = [\text{acetone}][\text{HO}_2]/[(\text{CH}_3)_2\text{C}(\text{OH})\text{OO}^\bullet]$  describing the fraction of acetone present as the hydroxy-alkylperoxy radical adducts. The separated reactants are favored entropically, but the adduct is favored energetically. The equilibrium will shift towards the adduct at lower temperatures, increasing the importance of this sink; Hermans et al.<sup>2</sup> proposed that at temperatures below 220K, the HO<sub>2</sub> route would provide a non-negligible sink for acetone. At such low temperatures the equilibrium constant depends critically on the energy difference between adduct and free reactants. Indeed, at 220K, a 1 kJ mol<sup>-1</sup> uncertainty on the energy difference constitutes an uncertainty of a factor of 1.73 on the equilibrium constant. The values of reported by Hermans et al.<sup>2</sup> (see table 3), seem well-converged at 58 to 59 kJ mol<sup>-1</sup>; however, these calculations all rely on B3LYP geometries and employ similar extrapolation schemes to estimate a CCSD(T) energy with a large basis set. The energies reported by Cours et al.<sup>3</sup> based on MP2 geometries and employing a CCSD(T)/6-311G(d,p) methodology as their best method show a well depth of only 47 kJ mol<sup>-1</sup>. The 11 kJ mol<sup>-1</sup> difference in estimated well depth between Hermans et al. and Course et al. implies an uncertainty of a factor of ~400 on the equilibrium constant at 220K, with the Course et al. values rendering the HO<sub>2</sub> channel negligible as an acetone sink across all regions of the atmosphere.

The quantum chemical methodologies used in the aforementioned studies employ a lower level of theory to obtain molecular geometries (usually DFT or MP2), followed by single-point energy calculations at a higher level of theory. Multiple single-point energy calculations are often combined to estimate the energy that would be obtained at a higher, computationally unattainable methodology; e.g. the G2M method used by Hermans et al.<sup>2</sup> employs CCSD(T) calculations with a small basis set combined with MP2 calculations at a small and large basis set, to estimate the CCSD(T) energy for the large basis set. Such extrapolation schemes carry additional uncertainties, but are shown to yield reliable results for a wide variety of chemical reactions, even if they fail for some reactions.

### *Quantum chemical calculations*

To gain further insight in the uncertainties on the theoretical predictions, we performed additional quantum chemical calculations to probe specific aspects of the predictions. To study the impact of the geometry used, we compared the geometries obtained at three levels of theory: B3LYP/cc-pVTZ (as used by Hermans et al.<sup>2</sup>), MP2/6-311G(d,p) (as used by Cours et al.<sup>3</sup>), and M05-2X/aug-cc-pVTZ (this work).

To avoid incurring additional uncertainties due to extensive energy extrapolation schemes, we calculate single point CCSD(T) energies directly with large basis sets, up to aug-cc-pVTZ; such calculations were computationally infeasible at the time of the Hermans et al.<sup>2</sup> publication. Finally, the CCSD(T) energies are then extrapolated to infinite basis set using the aug-Schwartz4 scheme proposed by Martin et al.;<sup>5</sup> note that extrapolating to the aug-cc-pV $\infty$ Z basis set using only aug-cc-pVDZ and -pVTZ data is not optimal, but is done here to illustrate the dependence on the basis set size. A more accurate estimation could be done if aug-cc-pVQZ data was available, but such calculations are outside our computing budget.

Geometry and frequency calculations using M05-2X, B3LYP and MP2 were performed using Gaussian-09;<sup>6</sup> the coupled-cluster calculations were ROHF-UCCSD(T)<sup>7</sup> single point energy calculations performed using Molpro-2010.<sup>8</sup> M05-2X/aug-cc-pVTZ zero-point vibrational energies were scaled by 0.964 as listed by Zheng et al.;<sup>9</sup> MP2/6-311G(d,p) ZPE are scaled by 0.9748 as derived by Scott and Radom;<sup>10</sup> B3LYP/cc-pVTZ ZPE are scaled here by 0.985 as

estimated from Zheng et al.<sup>9</sup> In this work, we did not explicitly account for degrees of freedom for internal rotation in acetone as described by Hermans et al.<sup>2</sup> Briefly, Hermans et al. found that an improved description of these internal modes changed the relative energy of reactants versus adduct by  $\sim 0.4$  kJ mol<sup>-1</sup>. For our current analysis, all levels of theory are expected to yield near-identical correction terms, canceling out in the assessment of the properties relative to the methodology used.

### Discussion

A first conclusion to be drawn is that the large difference between the predictions of Cours et al.<sup>3</sup> and Hermans et al.<sup>2</sup> is due entirely to an insufficient basis set size (6-311G(d,p)) in the calculations by Cours et al.; single-point energy calculations using more appropriate basis sets such as aug-cc-pVDZ and higher (see tables below) yield more comparable relative energies across the B3LYP geometries (Hermans et al.) and the MP2 geometries (Cours et al.). This observation also indicates that the relative energies can be fairly sensitive to basis set size. In view of the above, we disregard the Cours et al. energy predictions, though we will continue examining the MP2-based geometries.

A second observation is that the uncertainties in the quantum chemical calculations are mostly due to the change in chemical bonding between HOO<sup>•</sup> and acetone on the one hand, and (CH<sub>3</sub>)<sub>2</sub>C(OH)OO<sup>•</sup> and its decomposition TS on the other hand. The reaction enthalpy for the formation of the pre-reactive complex acetone--HO<sub>2</sub> are fairly similar across all methodologies (Table 1), as are the barrier height for decomposition of the adduct (Table 2, though logically we already see more impact by the change in bonding). The largest differences in predicted relative energies are found between the separated reactants and the adducts (Table 3), where a double bond is reduced to a single bond, a new carbon-oxygen bond is formed, and the substituent neighborhood is changed significantly.

Thirdly, we observe that all three sets of geometries, i.e. MP2, B3LYP and M05-2X show similar relative energies, with similar trends as to the well-depths and barrier heights with respect to basis set size in the single-point calculations. On an absolute scale, the B3LYP geometries seem to be the best, where we use the metric that these geometries yield the lowest absolute ROHF-UCCSD(T) energies, and are hence closest to the true energy minimum on the ROHF-UCCSD(T) potential energy surface for the structures examined. The absolute energy difference between the different geometry sets becomes smaller as the size of the basis set used in the CCSD(T) calculations increases.

The relative energy of the adduct with respect to the separated reactants reduces quite significantly upon increasing the basis set from double to triple zeta quality, on average by 4.3 kJ mol<sup>-1</sup>, with the largest change of nearly 5 kJ mol<sup>-1</sup> for the B3LYP geometries; this implies a reduction in the equilibrium constant at 220K of 1 order of magnitude; note that these uncertainties don't necessarily translate to other compounds such as HCHO or CH<sub>3</sub>CHO. Uncertainties of this order were already indicated by Hermans et al. Our current best level of theory available, i.e. B3LYP geometries and ROHF-CCSD(T) single-point energies extrapolated to infinite basis set, suggests a well depth of 54.4 kJ mol<sup>-1</sup>, 4.2 kJ mol<sup>-1</sup> below the best G2Mc values of Hermans et al. The current best level of theory without extrapolated energies (ROHF-CCSD(T)/aug-cc-pVTZ//B3LYP) has a well depth of 56.4 kJ mol<sup>-1</sup>, 2.2 kJ mol<sup>-1</sup> below the Hermans et al. values. At 220K, uncertainties of 4.2 and 2.2 kJ mol<sup>-1</sup> on the adduct stability implies an uncertainty of a factor 9.9 and 3.3, respectively, on the equilibrium constant; at 200K the uncertainties are a factor of 12.5 and 3.8, respectively.

## Conclusions

The uncertainties found for the addition well depth in the current set of calculations, combined with the high sensitivity of the equilibrium constant on this well depth at the low temperatures in the atmosphere where this reaction is thought to be important, indicates that the role of this reaction as an acetone sink is not fully elucidated yet. The best available calculations suggest that the HO<sub>2</sub>-channel is at best a minor sink throughout the atmosphere. Obviously these calculations carry their own uncertainty, but the trend seems to be that increasing the level of theory decreases the addition well depth and hence the equilibrium constant. No experimental evidence was found for the HO<sub>2</sub> addition to acetone, in this or earlier work; however, as discussed in the main article, this could be also be due to other interferences, or lack of sensitivity to the reaction examined. Further theoretical and experimental work is needed to determine the impact of this acetone sink more accurately. It should be noted that the uncertainties evident in our current set of calculations do not impact the importance of the HO<sub>2</sub> addition on carbonyl compounds as relevant in higher-temperature hydrocarbon autoxidation processes, nor are they of such extend that they invalidate the agreement between theory and experiment at 300K for HCHO and CH<sub>3</sub>CHO + HO<sub>2</sub> (see Hermans et al.<sup>2</sup>). At the low temperatures of the tropopause, however, small changes in energy have a much more pronounced impact on the predicted equilibrium constants.

**Table 1:** Stability of the acetone--HO<sub>2</sub> H-bonded complex (kJ/mol; ZPE-corrected) at various levels of theory.

| Methodology                       | Relative energy | Reference                     |
|-----------------------------------|-----------------|-------------------------------|
| M05-2X/aug-cc-pVTZ                | 42.3            | This work                     |
| B3LYP/6-311++G(3df,3pd)           | 37.2            | Aloisio et al.                |
| B3LYP/cc-pVTZ                     | 39.8            | Hermans et al. (recalculated) |
| MP2/6-311G(d,p)                   | 41.4            | Cours et al. (recalculated)   |
| PMP2/6-311G(d,p)//MP2             | 36.0            | Cours et al.                  |
| PMP4/6-311G(d,p)//MP2             | 35.1            | Cours et al.                  |
| CBS-QB3                           | 39.7            | Hermans et al.                |
| G3                                | 41.4            | Hermans et al.                |
| G2Mc//B3LYP (estimated)           | 41.0            | Hermans et al.                |
| CCSD(T)/6-311G(d,p)//MP2          | 34.1            | Cours et al.                  |
| CCSD(T)/aug-cc-pVDZ//M05-2X       | 43.7            | This work                     |
| CCSD(T)/aug-cc-pVDZ//B3LYP        | 42.6            | This work                     |
| CCSD(T)/aug-cc-pVDZ//MP2          | 40.8            | This work                     |
| CCSD(T)/aug-cc-pVTZ//M05-2X       | 42.3            | This work                     |
| CCSD(T)/aug-cc-pVTZ//B3LYP        | 41.1            | This work                     |
| CCSD(T)/aug-cc-pVTZ//MP2          | 39.8            | This work                     |
| CCSD(T)/aug-Schwartz4(DT)//M05-2X | 41.9            | This work                     |
| CCSD(T)/aug-Schwartz4(DT)//B3LYP  | 40.7            | This work                     |
| CCSD(T)/aug-Schwartz4(DT)//MP2    | 39.4            | This work                     |

**Table 2:** Energy barrier for decomposition of the  $\alpha$ -OH-alkylperoxy radical of acetone (kJ/mol; ZPE-corrected) forming the H-bonded complex.

| Methodology                       | Relative energy | Reference                     |
|-----------------------------------|-----------------|-------------------------------|
| M05-2X/aug-cc-pVTZ                | 45.9            | This work                     |
| B3LYP/cc-pVTZ                     | 26.1            | Hermans et al. (recalculated) |
| MP2/6-311G(d,p)                   | 39.0            | Cours et al. (recalculated)   |
| PMP2/6-311G(d,p)//MP2             | 35.9            | Cours et al.                  |
| PMP4/6-311G(d,p)//MP2             | 37.1            | Cours et al.                  |
| CBS-QB3                           | 48.1            | Hermans et al.                |
| G3                                | 47.7            | Hermans et al.                |
| G2Mc//B3LYP (estimated)           | 46.7            | Hermans et al.                |
| CCSD(T)/6-311G(d,p)//MP2          | 44.9            | Cours et al.                  |
| CCSD(T)/aug-cc-pVDZ//M05-2X       | 49.7            | This work                     |
| CCSD(T)/aug-cc-pVDZ//B3LYP        | 48.8            | This work                     |
| CCSD(T)/aug-cc-pVDZ//MP2          | 50.0            | This work                     |
| CCSD(T)/aug-cc-pVTZ//M05-2X       | 47.7            | This work                     |
| CCSD(T)/aug-cc-pVTZ//B3LYP        | 46.9            | This work                     |
| CCSD(T)/aug-cc-pVTZ//MP2          | 48.0            | This work                     |
| CCSD(T)/aug-Schwartz4(DT)//M05-2X | 47.0            | This work                     |
| CCSD(T)/aug-Schwartz4(DT)//B3LYP  | 45.9            | This work                     |
| CCSD(T)/aug-Schwartz4(DT)//MP2    | 47.3            | This work                     |

**Table 3:** ZPE-corrected potential energy difference (kJ/mol; ZPE-corrected) between the  $\alpha$ -OH-alkylperoxy radical formed from acetone, and the limit of infinite separation of acetone + HO<sub>2</sub>.

| Methodology                       | Relative energy   | Reference                     |
|-----------------------------------|-------------------|-------------------------------|
| M05-2X/aug-cc-pVTZ                | 66.4              | This work                     |
| B3LYP/cc-pVTZ                     | 31.0              | Hermans et al. (recalculated) |
| MP2/6-311G(d,p)                   | 48.3              | Cours et al. (recalculated)   |
| PMP2/6-311G(d,p)//MP2             | 48.2              | Cours et al.                  |
| PMP4/6-311G(d,p)//MP2             | 43.5              | Cours et al.                  |
| CBS-QB3                           | 58.2 <sup>a</sup> | Hermans et al.                |
| G3                                | 58.2 <sup>a</sup> | Hermans et al.                |
| G2Mc//B3LYP (estimated)           | 58.6 <sup>a</sup> | Hermans et al.                |
| CCSD(T)/6-311G(d,p)//MP2          | 46.9              | Cours et al.                  |
| CCSD(T)/aug-cc-pVDZ//M05-2X       | 62.2              | This work                     |
| CCSD(T)/aug-cc-pVDZ//B3LYP        | 61.3              | This work                     |
| CCSD(T)/aug-cc-pVDZ//MP2          | 58.5              | This work                     |
| CCSD(T)/aug-cc-pVTZ//M05-2X       | 57.6              | This work                     |
| CCSD(T)/aug-cc-pVTZ//B3LYP        | 56.4              | This work                     |
| CCSD(T)/aug-cc-pVTZ//MP2          | 55.2              | This work                     |
| CCSD(T)/aug-Schwartz4(DT)//M05-2X | 55.4              | This work                     |
| CCSD(T)/aug-Schwartz4(DT)//B3LYP  | 54.4              | This work                     |
| CCSD(T)/aug-Schwartz4(DT)//MP2    | 54.0              | This work                     |

<sup>a</sup> ~0.1 kcal/mol was subtracted to correct for the change in zero-point vibrational energy incurred by the rigorous treatment of internal rotors (see Hermans et al.<sup>2</sup>).

## References

1. S. Aloisio and J. S. Francisco, *J. Phys. Chem. A*, 2000, **104**, 3211-3224.
2. I. Hermans, J.-F. Müller, T. L. Nguyen, P. A. Jacobs, and J. Peeters, *J. Phys. Chem. A*, 2005, **109**, 4303-4311.
3. T. Cours, S. Canneaux, and F. Bohr, *Int. J. Quantum Chem.*, 2007, **107**, 1344-1354.
4. F. J. Grieman, A. C. Noell, C. Davis-Van Atta, M. Okumura, and S. P. Sander, *J. Phys. Chem. A*, 2011, 110908080530022.
5. J. M. L. Martin, *Chem. Phys. Lett.*, 1996, **259**, 669-678.
6. M. J. Frisch, G. W. Trucks, H. B. Schlegel, G. E. Scuseria, M. A. Robb, J. R. Cheeseman, G. Scalmani, V. Barone, B. Mennucci, G. A. Petersson, H. Nakatsuji, M. Caricato, X. Li, H. P. Hratchian, A. F. Izmaylov, J. Bloino, G. Zheng, J. L. Sonnenberg, M. Hada, M. Ehara, K. Toyota, R. Fukuda, J. Hasegawa, M. Ishida, T. Nakajima, Y. Honda, O. Kitao, H. Nakai, T. Vreven, J. A. Montgomery Jr., J. E. Peralta, F. Ogliaro, M. Bearpark, J. J. Heyd, E. Brothers, K. N. Kudin, V. N. Staroverov, T. Keith, R. Kobayashi, J. Normand, J. Normand, K. Raghavachari, A. Rendell, J. C. Burant, S. S. Iyengar, J. Tomasi, M. Cossi, N. Rega, J. M. Millam, M. Klene, J. E. Knox, J. B. Cross, V. Bakken, C. Adamo, J. Jaramillo, R. Gomperts, R. E. Stratmann, O. Yazyev, A. J. Austin, R. Cammi, C. Pomelli, J. W. Ochterski, R. L. Martin, K. Morokuma, V. G. Zakrzewski, G. A. Voth, P. Salvador, J. J. Dannenberg, S. Dapprich, A. D. Daniels, O. Farkas, J. B. Foresman, J. V. Ortiz, J. Cioslowski, D. J. Fox, and J. A. Pople, *Gaussian 09, Revision B.01*, Gaussian Inc., Wallington CT, 2010.
7. P. J. Knowles, C. Hampel, and H.-J. Werner, *J. Chem. Phys.*, 1993, **99**, 5219-5227.
8. H.-J. Werner, P. J. Knowles, G. Knizia, F. R. Manby, M. Schütz, P. Celani, T. Korona, R. Lindh, A. Mitrushenkov, G. Rauhut, K. R. Shamasundar, T. B. Adler, R. D. Amos, A. Bernhardsson, A. Berning, D. L. Cooper, M. J. O. Deegan, A. J. Dobbyn, F. Eckert, E. Goll, C. Hampel, A. Hesselmann, G. Hetzer, T. Hrenar, G. Jansen, C. Köppl, Y. Liu, A. W. Lloyd, R. A. Mata, A. J. May, S. J. McNicholas, W. Meyer, M. E. Mura, A. Nicklass, D. P. O'Neill, P. Palmieri, K. Pflüger, R. Pitzer, M. Reiher, T. Shiozaki, H. Stoll, A. J. Stone, R. Tarroni, T. Thorsteinsson, M. Wang, and A. Wolf, *MOLPRO, version 2010.1, a package of ab initio programs*, molpro, 2010.
9. J. Zheng, I. M. Alecu, B. J. Lynch, Y. Zhao, and D. G. Truhlar, .
10. A. P. Scott and L. Radom, *J. Phys. Chem.*, 1996, **100**, 16502-16513.

## Quantum chemical data

### a) M05-2X/aug-cc-pVTZ geometries

```
acetone.C2v
-----
E(RM052X/Aug-CC-pVTZ) (Hartree): -193.20110143
E(ROHF-UCCSD(T)/Aug-CC-pVDZ) (Hartree): -192.67623312
E(ROHF-UCCSD(T)/Aug-CC-pVTZ) (Hartree): -192.85141364
E(ROHF-UCCSD(T)/Aug-CC-pVQZ) (Hartree): -192.90077027
Point group : C2V
Electronic state : 1-A1
Cartesian coordinates (Angs):
  C      0.000000      0.000000      0.183704
  C      0.000000      1.279595     -0.609907
  C      0.000000     -1.279595     -0.609907
  H     -0.876208      1.311184     -1.255514
  H      0.000000      2.129554      0.061668
  H      0.876208      1.311184     -1.255514
  H     -0.876208     -1.311184     -1.255514
  H      0.876208     -1.311184     -1.255514
```

|                                           |            |           |           |  |
|-------------------------------------------|------------|-----------|-----------|--|
| H                                         | 0.000000   | -2.129554 | 0.061668  |  |
| O                                         | 0.000000   | 0.000000  | 1.389423  |  |
| Rotational constants (GHz):               | 10.2589600 | 8.6443800 | 4.9773600 |  |
| Vibrational harmonic frequencies (cm-1):  |            |           |           |  |
| 147.9093                                  | 133.8503   |           | 375.9216  |  |
| 490.4565                                  | 544.5136   |           | 817.0493  |  |
| 896.1726                                  | 908.2528   |           | 1096.8960 |  |
| 1137.8371                                 | 1269.2155  |           | 1402.1687 |  |
| 1414.6413                                 | 1479.9781  |           | 1486.5762 |  |
| 1490.6464                                 | 1509.5899  |           | 1841.8479 |  |
| 3088.4451                                 | 3094.3905  |           | 3147.0705 |  |
| 3154.2036                                 | 3199.7863  |           | 3200.8963 |  |
| Zero-point correction (Hartree): 0.084703 |            |           |           |  |

acetone..HO2.a

-----

E(UM052X/Aug-CC-pVTZ) (Hartree): -344.16372115  
 E(ROHF-UCCSD(T)/Aug-CC-pVDZ) (Hartree): -343.29510528  
 E(ROHF-UCCSD(T)/Aug-CC-pVTZ) (Hartree): -343.59606141  
 Electronic state : 2-A  
 Cartesian coordinates (Angs):

|                                           |           |           |           |  |
|-------------------------------------------|-----------|-----------|-----------|--|
| C                                         | 1.147961  | -0.068815 | -0.015630 |  |
| O                                         | 0.317517  | -0.955483 | -0.036684 |  |
| H                                         | -1.386091 | -0.822256 | -0.083699 |  |
| O                                         | -2.367742 | -0.691078 | -0.087467 |  |
| O                                         | -2.545419 | 0.581694  | 0.150970  |  |
| C                                         | 0.770157  | 1.377816  | -0.085325 |  |
| H                                         | 1.064768  | 1.758134  | -1.063750 |  |
| H                                         | -0.298844 | 1.498860  | 0.048684  |  |
| H                                         | 1.325048  | 1.945826  | 0.658285  |  |
| C                                         | 2.608322  | -0.392041 | 0.079665  |  |
| H                                         | 3.170063  | 0.181150  | -0.654543 |  |
| H                                         | 2.964309  | -0.089840 | 1.064225  |  |
| H                                         | 2.767258  | -1.454696 | -0.056013 |  |
| Rotational constants (GHz):               | 7.4197500 | 1.5132100 | 1.2812900 |  |
| Vibrational harmonic frequencies (cm-1):  |           |           |           |  |
| 48.9035                                   | 69.0109   |           | 91.5689   |  |
| 101.5918                                  | 126.7144  |           | 145.1437  |  |
| 221.9271                                  | 392.5105  |           | 492.6653  |  |
| 562.2234                                  | 725.8026  |           | 829.2518  |  |
| 899.3746                                  | 929.6109  |           | 1105.6714 |  |
| 1141.1753                                 | 1275.2530 |           | 1290.2683 |  |
| 1412.2561                                 | 1427.6568 |           | 1479.2988 |  |
| 1482.3901                                 | 1491.6421 |           | 1511.4886 |  |
| 1585.6132                                 | 1799.3026 |           | 3073.0908 |  |
| 3081.7636                                 | 3133.5153 |           | 3140.5555 |  |
| 3188.8895                                 | 3198.1217 |           | 3261.3845 |  |
| Zero-point correction (Hartree): 0.101870 |           |           |           |  |

acetone

-----

E(RM052X/Aug-CC-pVTZ) (Hartree): -193.20114139  
 E(ROHF-UCCSD(T)/Aug-CC-pVDZ) (Hartree): -192.67624545  
 E(ROHF-UCCSD(T)/Aug-CC-pVTZ) (Hartree): -192.85142020  
 E(ROHF-UCCSD(T)/Aug-CC-pVQZ) (Hartree): -192.90077444  
 Electronic state : 1-A  
 Cartesian coordinates (Angs):

|                                           |            |           |           |  |
|-------------------------------------------|------------|-----------|-----------|--|
| C                                         | 0.000000   | 0.184113  | -0.000032 |  |
| C                                         | 1.279324   | -0.610205 | -0.000027 |  |
| C                                         | -1.279324  | -0.610205 | 0.000238  |  |
| H                                         | 1.307911   | -1.260599 | -0.872756 |  |
| H                                         | 2.129588   | 0.060941  | -0.005558 |  |
| H                                         | 1.312643   | -1.251168 | 0.879545  |  |
| H                                         | -1.312636  | -1.251485 | -0.879102 |  |
| H                                         | -1.307917  | -1.260283 | 0.873202  |  |
| H                                         | -2.129588  | 0.060943  | 0.005522  |  |
| O                                         | 0.000000   | 1.389929  | -0.000241 |  |
| Rotational constants (GHz):               | 10.2514900 | 8.6482500 | 4.9768600 |  |
| Vibrational harmonic frequencies (cm-1):  |            |           |           |  |
| 42.8105                                   | 144.8107   |           | 380.0086  |  |
| 495.6686                                  | 542.5237   |           | 812.8773  |  |
| 898.3009                                  | 905.4888   |           | 1097.4285 |  |
| 1140.4615                                 | 1265.6303  |           | 1405.1037 |  |
| 1414.1466                                 | 1478.8309  |           | 1486.7642 |  |
| 1489.7020                                 | 1510.4260  |           | 1840.2737 |  |
| 3093.9009                                 | 3099.8350  |           | 3148.4869 |  |
| 3155.7407                                 | 3209.9939  |           | 3211.0343 |  |
| Zero-point correction (Hartree): 0.084908 |            |           |           |  |

CH3COHOCH3.pm

-----  
E(UM052X/Aug-CC-pVTZ) (Hartree): -344.17632082  
E(ROHF-UCCSD(T)/Aug-CC-pVDZ) (Hartree): -343.30538282  
E(ROHF-UCCSD(T)/Aug-CC-pVTZ) (Hartree): -343.60507528  
Electronic state : 2-A  
Cartesian coordinates (Angs):  
O 0.791921 -0.594321 -0.636492  
C -0.366908 0.028118 0.062589  
O -0.199577 -0.141192 1.423230  
H 0.626013 0.286592 1.675337  
O 1.908436 -0.179666 -0.133034  
C -1.553134 -0.772981 -0.395034  
H -2.453066 -0.353328 0.043673  
H -1.629905 -0.738925 -1.477539  
H -1.440840 -1.801498 -0.067604  
C -0.396000 1.482156 -0.347385  
H -0.490846 1.571141 -1.425782  
H -1.243429 1.962952 0.131983  
H 0.522080 1.970735 -0.030717  
Rotational constants (GHz): 4.8819300 3.0820100 2.9943000  
Vibrational harmonic frequencies (cm-1):  
149.7009 199.1406 265.2761  
285.9003 343.0259 393.0081  
421.6523 465.6799 506.3466  
616.1965 764.0881 858.7239  
951.2168 1021.0689 1033.1092  
1144.9429 1205.9669 1284.1275  
1302.4550 1395.1191 1432.5731  
1457.2162 1499.2282 1503.4050  
1521.7081 1524.6965 3091.4298  
3100.6293 3166.3911 3177.4477  
3180.4060 3183.3135 3823.8111  
Zero-point correction (Hartree): 0.105409

CH3COHOCH3.pp

-----  
E(UM052X/Aug-CC-pVTZ) (Hartree): -344.17258043  
E(ROHF-UCCSD(T)/Aug-CC-pVDZ) (Hartree): -343.30179447  
E(ROHF-UCCSD(T)/Aug-CC-pVTZ) (Hartree): -343.60143331  
Electronic state : 2-A  
Cartesian coordinates (Angs):  
O -0.816631 -0.658560 -0.521603  
C 0.353484 0.043322 0.051844  
O 0.335787 -0.112829 1.430492  
O -1.940485 -0.165457 -0.103032  
H 0.472324 -1.038419 1.650528  
C 1.521420 -0.653935 -0.603106  
H 1.478251 -0.533614 -1.681322  
H 2.444173 -0.222957 -0.227397  
H 1.499358 -1.716986 -0.370454  
C 0.254186 1.512684 -0.256062  
H 1.143294 2.008474 0.121431  
H 0.181022 1.663839 -1.328738  
H -0.622337 1.922010 0.233036  
Rotational constants (GHz): 4.8192400 3.0723400 2.9652900  
Vibrational harmonic frequencies (cm-1):  
130.9135 202.2131 246.9310  
282.9682 325.1755 367.5031  
405.6657 431.2168 493.8945  
614.1494 772.8279 861.5291  
954.9239 1021.0471 1028.4181  
1152.6721 1193.3813 1262.2179  
1300.4323 1384.2167 1436.8596  
1445.1779 1498.6002 1501.8423  
1515.9012 1523.6482 3089.8284  
3098.8054 3162.4715 3173.1275  
3184.6791 3187.3329 3854.0366  
Zero-point correction (Hartree): 0.105034

CH3COHOCH3.pt

-----  
E(UM052X/Aug-CC-pVTZ) (Hartree): -344.17356680  
E(ROHF-UCCSD(T)/Aug-CC-pVDZ) (Hartree): -343.30256884  
E(ROHF-UCCSD(T)/Aug-CC-pVTZ) (Hartree): -343.60248128  
Electronic state : 2-A  
Cartesian coordinates (Angs):

|                                                       |                 |           |                 |                                         |
|-------------------------------------------------------|-----------------|-----------|-----------------|-----------------------------------------|
| O                                                     | 0.883078        | -0.070758 | -0.781894       |                                         |
| C                                                     | -0.382806       | 0.010354  | -0.005343       |                                         |
| O                                                     | -1.370504       | -0.070096 | -0.972921       |                                         |
| O                                                     | 1.929498        | -0.005606 | -0.023477       |                                         |
| H                                                     | -1.398972       | -0.961960 | -1.329634       |                                         |
| C                                                     | -0.406807       | -1.149260 | 0.959996        |                                         |
| H                                                     | 0.422134        | -1.074496 | 1.655303        |                                         |
| H                                                     | -1.345281       | -1.130134 | 1.506027        |                                         |
| H                                                     | -0.325459       | -2.088507 | 0.415510        |                                         |
| C                                                     | -0.453798       | 1.365518  | 0.643416        |                                         |
| H                                                     | -0.435662       | 2.131657  | -0.125531       |                                         |
| H                                                     | -1.381779       | 1.440499  | 1.202386        |                                         |
| H                                                     | 0.388909        | 1.494948  | 1.313857        |                                         |
| Rotational constants (GHz):                           |                 |           |                 | 4.7675100    3.0559800    2.9801900     |
| Vibrational harmonic frequencies (cm-1):              |                 |           |                 |                                         |
| 137.4652                                              | 213.7186        |           | 256.6103        |                                         |
| 279.7465                                              | 354.7439        |           | 365.9677        |                                         |
| 372.8861                                              | 473.4393        |           | 497.1830        |                                         |
| 548.7479                                              | 772.2001        |           | 883.0949        |                                         |
| 957.3060                                              | 1019.2804       |           | 1037.2043       |                                         |
| 1150.0301                                             | 1191.2230       |           | 1285.4872       |                                         |
| 1319.7774                                             | 1383.0802       |           | 1432.8269       |                                         |
| 1444.3896                                             | 1496.8361       |           | 1503.8181       |                                         |
| 1519.4121                                             | 1526.1058       |           | 3086.6734       |                                         |
| 3095.5733                                             | 3159.9895       |           | 3173.4726       |                                         |
| 3183.2220                                             | 3188.7248       |           | 3860.8620       |                                         |
| Zero-point correction (Hartree): 0.105186             |                 |           |                 |                                         |
| HO2                                                   |                 |           |                 |                                         |
| ---                                                   |                 |           |                 |                                         |
| E(UM052X/Aug-CC-pVTZ) (Hartree): -150.94420033        |                 |           |                 |                                         |
| E(ROHF-UCCSD(T)/Aug-CC-pVDZ) (Hartree): -150.59977968 |                 |           |                 |                                         |
| E(ROHF-UCCSD(T)/Aug-CC-pVTZ) (Hartree): -150.72605502 |                 |           |                 |                                         |
| E(ROHF-UCCSD(T)/Aug-CC-pVQZ) (Hartree): -150.76505290 |                 |           |                 |                                         |
| Point group : CS                                      |                 |           |                 |                                         |
| Electronic state : 2-A"                               |                 |           |                 |                                         |
| Cartesian coordinates (Angs):                         |                 |           |                 |                                         |
| O                                                     | 0.054932        | 0.708542  | 0.000000        |                                         |
| O                                                     | 0.054932        | -0.600610 | 0.000000        |                                         |
| H                                                     | -0.878913       | -0.863457 | 0.000000        |                                         |
| Rotational constants (GHz):                           |                 |           |                 | 630.9298100    34.6623400    32.8572100 |
| Vibrational harmonic frequencies (cm-1):              |                 |           |                 |                                         |
| 1240.8792 ( A')                                       | 1469.2622 ( A') |           | 3707.9570 ( A') |                                         |
| Zero-point correction (Hartree): 0.014622             |                 |           |                 |                                         |
| TSa                                                   |                 |           |                 |                                         |
| ---                                                   |                 |           |                 |                                         |
| E(UM052X/Aug-CC-pVTZ) (Hartree): -344.15409159        |                 |           |                 |                                         |
| E(ROHF-UCCSD(T)/Aug-CC-pVDZ) (Hartree): -343.28170359 |                 |           |                 |                                         |
| E(ROHF-UCCSD(T)/Aug-CC-pVTZ) (Hartree): -343.58214724 |                 |           |                 |                                         |
| Electronic state : 2-A                                |                 |           |                 |                                         |
| Cartesian coordinates (Angs):                         |                 |           |                 |                                         |
| C                                                     | 0.563064        | 0.000000  | 0.216766        |                                         |
| O                                                     | -0.049910       | 0.000000  | 1.332613        |                                         |
| O                                                     | -1.026930       | 0.000000  | -0.900037       |                                         |
| O                                                     | -1.934592       | 0.000000  | -0.007381       |                                         |
| H                                                     | -1.235397       | 0.000000  | 0.926536        |                                         |
| C                                                     | 1.165510        | -1.280475 | -0.277791       |                                         |
| H                                                     | 1.311294        | -1.257873 | -1.353233       |                                         |
| H                                                     | 2.136270        | -1.399632 | 0.203007        |                                         |
| H                                                     | 0.533613        | -2.116179 | 0.002630        |                                         |
| C                                                     | 1.165509        | 1.280475  | -0.277791       |                                         |
| H                                                     | 2.136270        | 1.399633  | 0.203007        |                                         |
| H                                                     | 1.311294        | 1.257873  | -1.353233       |                                         |
| H                                                     | 0.533613        | 2.116179  | 0.002630        |                                         |
| Rotational constants (GHz):                           |                 |           |                 | 4.8724400    2.8736800    2.7590200     |
| Vibrational harmonic frequencies (cm-1):              |                 |           |                 |                                         |
| i628.2509                                             | 113.2629        |           | 185.2937        |                                         |
| 214.9113                                              | 268.4959        |           | 286.1844        |                                         |
| 387.5183                                              | 526.6448        |           | 615.7914        |                                         |
| 706.8581                                              | 752.2749        |           | 851.0191        |                                         |
| 924.0118                                              | 983.7890        |           | 1053.3549       |                                         |
| 1089.0960                                             | 1160.7170       |           | 1294.1090       |                                         |
| 1368.1140                                             | 1421.4357       |           | 1428.7960       |                                         |
| 1488.3980                                             | 1490.7599       |           | 1493.7654       |                                         |
| 1513.8953                                             | 1664.2139       |           | 1928.9970       |                                         |
| 3088.6523                                             | 3092.7934       |           | 3156.0317       |                                         |
| 3161.4227                                             | 3193.0952       |           | 3195.3246       |                                         |

Zero-point correction (Hartree): 0.100465

### *b) B3LYP/cc-pVTZ geometries*

The geometries were obtained from the supporting information provided by Hermans et al.<sup>2</sup>

acetone..HO2.a

-----  
E(UB3LYP/CC-pVTZ) (Hartree): -344.21978692  
E(ROHF-UCCSD(T)/Aug-CC-pVDZ) (Hartree): -343.29709874  
E(ROHF-UCCSD(T)/Aug-CC-pVTZ) (Hartree): -343.59696895  
Electronic state : 2-A  
Cartesian coordinates (Angs):  
C -1.154293 -0.066269 0.007335  
O -0.336057 -0.970369 0.018353  
H 1.373182 -0.818403 0.038825  
O 2.363716 -0.714839 0.040823  
O 2.574152 0.590548 -0.071834  
C -0.749176 1.382232 0.040466  
H -1.068745 1.818956 0.990529  
H 0.328713 1.485246 -0.061456  
H -1.262821 1.938619 -0.745853  
C -2.628313 -0.375355 -0.038226  
H -3.157834 0.160967 0.751210  
H -3.042619 -0.027031 -0.987478  
H -2.793674 -1.444721 0.058029  
Rotational constants (GHz): 7.3478100 1.4993400 1.2655800  
Vibrational harmonic frequencies (cm-1):  
24.1126 59.9543 83.3091  
106.4376 142.6707 157.3456  
235.1780 396.9073 495.1318  
560.2946 704.3795 799.4189  
894.2767 910.5423 1097.8856  
1126.6794 1199.0519 1259.5513  
1394.0529 1402.0477 1461.0990  
1466.7218 1473.3577 1493.0268  
1574.9425 1755.5963 3024.8939  
3035.2664 3080.1322 3089.0724  
3132.2525 3145.0496 3240.5745  
Zero-point correction (Hartree): 0.100288

acetone

-----  
E(RB3LYP/CC-pVTZ) (Hartree): -193.23315782  
E(ROHF-UCCSD(T)/Aug-CC-pVDZ) (Hartree): -192.67726506  
E(ROHF-UCCSD(T)/Aug-CC-pVTZ) (Hartree): -192.85172202  
Point group : C2V  
Electronic state : 1-A1  
Cartesian coordinates (Angs):  
C 0.000000 0.000000 0.184854  
C 0.000000 1.288132 -0.611596  
C 0.000000 -1.288132 -0.611596  
H -0.876879 1.331865 -1.261519  
H 0.000000 2.140866 0.061926  
H 0.876879 1.331865 -1.261519  
H -0.876879 -1.331865 -1.261519  
H 0.876879 -1.331865 -1.261519  
H 0.000000 -2.140866 0.061926  
O 0.000000 0.000000 1.394032  
Rotational constants (GHz): 10.1924200 8.5207100 4.9211100  
Vibrational harmonic frequencies (cm-1):  
18.7053 132.8217 377.9300  
489.6186 535.2593 781.7587  
884.7872 885.6786 1084.3873  
1120.4172 1233.8576 1386.8630  
1387.5347 1460.5097 1465.9615  
1470.4680 1488.1311 1794.2096  
3026.0070 3033.1576 3077.9625  
3085.4881 3139.1723 3140.2610  
Zero-point correction (Hartree): 0.083155

CH3COHOCH3.pm

-----  
E(UB3LYP/CC-pVTZ) (Hartree): -344.21918700  
E(ROHF-UCCSD(T)/Aug-CC-pVDZ) (Hartree): -343.30704282  
E(ROHF-UCCSD(T)/Aug-CC-pVTZ) (Hartree): -343.60556499

Electronic state : 2-A  
 Cartesian coordinates (Angs):

|   |           |           |           |
|---|-----------|-----------|-----------|
| O | 0.813880  | -0.531251 | -0.687096 |
| C | -0.380832 | 0.028328  | 0.069852  |
| O | -0.167414 | -0.157073 | 1.420654  |
| H | 0.690386  | 0.238034  | 1.632018  |
| O | 1.938468  | -0.164382 | -0.124598 |
| C | -1.538143 | -0.831160 | -0.379844 |
| H | -2.458495 | -0.464463 | 0.072099  |
| H | -1.639661 | -0.798103 | -1.463189 |
| H | -1.376425 | -1.859539 | -0.063416 |
| C | -0.478708 | 1.492924  | -0.324298 |
| H | -0.615438 | 1.601997  | -1.399360 |
| H | -1.325352 | 1.945993  | 0.189613  |
| H | 0.431614  | 2.017182  | -0.033700 |

Rotational constants (GHz): 4.8192000 3.0227300 2.9280700  
 Vibrational harmonic frequencies (cm-1):

|           |           |           |
|-----------|-----------|-----------|
| 104.9642  | 192.9858  | 253.1076  |
| 273.4942  | 335.9886  | 365.9334  |
| 410.7507  | 444.4026  | 491.1278  |
| 589.1794  | 687.6626  | 820.3942  |
| 938.8709  | 1005.7079 | 1020.3347 |
| 1119.6214 | 1177.4092 | 1219.8171 |
| 1271.5851 | 1389.7148 | 1410.8456 |
| 1434.5210 | 1479.8604 | 1483.9932 |
| 1500.9323 | 1504.2952 | 3043.6508 |
| 3055.6865 | 3115.1674 | 3119.6762 |
| 3127.8776 | 3134.1102 | 3737.8938 |

Zero-point correction (Hartree): 0.103113

CH3COHOCH3.pp

-----  
 E(UB3LYP/CC-pVTZ) (Hartree): -344.21549298  
 E(ROHF-UCCSD(T)/Aug-CC-pVDZ) (Hartree): -343.30348307  
 E(ROHF-UCCSD(T)/Aug-CC-pVTZ) (Hartree): -343.60198624  
 Electronic state : 2-A  
 Cartesian coordinates (Angs):

|   |           |           |           |
|---|-----------|-----------|-----------|
| O | -0.833499 | -0.680941 | -0.491989 |
| C | 0.366060  | 0.048547  | 0.053701  |
| O | 0.355879  | -0.044875 | 1.439009  |
| O | -1.972975 | -0.166304 | -0.089227 |
| H | 0.492552  | -0.963372 | 1.698198  |
| C | 1.520775  | -0.699587 | -0.587870 |
| H | 1.470334  | -0.638322 | -1.673644 |
| H | 2.461255  | -0.266418 | -0.251698 |
| H | 1.496155  | -1.753105 | -0.304264 |
| C | 0.269860  | 1.510562  | -0.319001 |
| H | 1.141990  | 2.037072  | 0.065012  |
| H | 0.229150  | 1.627135  | -1.400397 |
| H | -0.626853 | 1.936839  | 0.123480  |

Rotational constants (GHz): 4.7520700 3.0126200 2.8943700  
 Vibrational harmonic frequencies (cm-1):

|           |           |           |
|-----------|-----------|-----------|
| 111.5311  | 191.8008  | 230.2472  |
| 270.9602  | 321.3484  | 369.2922  |
| 397.6817  | 425.6512  | 479.5531  |
| 591.4427  | 705.3184  | 819.2486  |
| 939.8664  | 1000.0276 | 1016.4886 |
| 1131.4110 | 1165.2558 | 1200.4102 |
| 1267.8221 | 1380.3602 | 1416.4805 |
| 1422.8207 | 1480.8611 | 1484.1996 |
| 1496.3113 | 1504.3937 | 3041.0938 |
| 3058.4806 | 3108.2254 | 3124.4691 |
| 3130.5794 | 3143.7530 | 3790.0585 |

Zero-point correction (Hartree): 0.103013

CH3COHOCH3.pt

-----  
 E(UB3LYP/CC-pVTZ) (Hartree): -344.21651955  
 E(ROHF-UCCSD(T)/Aug-CC-pVDZ) (Hartree): -343.30428668  
 E(ROHF-UCCSD(T)/Aug-CC-pVTZ) (Hartree): -343.60306535  
 Electronic state : 2-A  
 Cartesian coordinates (Angs):

|   |           |           |           |
|---|-----------|-----------|-----------|
| O | 0.901327  | -0.048432 | -0.778640 |
| C | -0.397597 | 0.007812  | -0.003816 |
| O | -1.366304 | -0.055257 | -0.993204 |
| O | 1.963742  | 0.002210  | -0.009968 |
| H | -1.395073 | -0.947770 | -1.356216 |
| C | -0.419316 | -1.180262 | 0.938421  |

```

H      0.420803      -1.135177      1.627405
H      -1.350028      -1.177385      1.503843
H      -0.351502      -2.112386      0.374263
C      -0.482286      1.359154      0.668256
H      -0.491617      2.141681      -0.088243
H      -1.400036      1.421475      1.251094
H      0.372529      1.501168      1.325184
Rotational constants (GHz):   4.7035700      2.9896700      2.9102300
Vibrational harmonic frequencies (cm-1):
127.6577      208.8278      248.3443
270.2040      347.8923      359.3209
375.4125      459.2398      488.5697
522.7270      722.6399      829.5449
942.1703      1007.6976      1018.3438
1131.9337      1154.4035      1205.6416
1287.1005      1378.3770      1412.0353
1422.5345      1478.2605      1486.2531
1499.7445      1507.0356      3039.4897
3056.2766      3107.7036      3125.9679
3136.0872      3141.9348      3792.6705
Zero-point correction (Hartree): 0.103183

HO2
---
E(UB3LYP/CC-pVTZ) (Hartree): -150.96848020
E(ROHF-UCCSD(T)/Aug-CC-pVDZ) (Hartree): -150.60066603
E(ROHF-UCCSD(T)/Aug-CC-pVTZ) (Hartree): -150.72660766
E(ROHF-UCCSD(T)/Aug-CC-pVQZ) (Hartree): -150.76537056
Point group : CS
Electronic state : 2-A"
Cartesian coordinates (Angs):
O      0.055350      0.718742      0.000000
O      0.055350      -0.610515      0.000000
H      -0.885607      -0.865819      0.000000
Rotational constants (GHz):   620.4772900      33.6732400      31.9398600
Vibrational harmonic frequencies (cm-1):
1160.0435 ( A')      1431.6074 ( A')      3605.0039 ( A')
Zero-point correction (Hartree): 0.014117

TSa
---
E(UB3LYP/CC-pVTZ) (Hartree): -344.20387632
E(ROHF-UCCSD(T)/Aug-CC-pVDZ) (Hartree): -343.28309106
E(ROHF-UCCSD(T)/Aug-CC-pVTZ) (Hartree): -343.58232018
Electronic state : 2-A
Cartesian coordinates (Angs):
C      0.583472      0.000000      0.212002
O      -0.052606      -0.000003      1.324450
O      -1.070936      -0.000001      -0.915761
O      -1.963719      0.000000      0.012973
H      -1.186805      -0.000001      0.961081
C      1.187977      -1.287826      -0.276311
H      1.341443      -1.280235      -1.354114
H      2.163046      -1.414650      0.203343
H      0.559708      -2.129501      0.005428
C      1.187971      1.287831      -0.276308
H      2.163035      1.414662      0.203352
H      1.341443      1.280240      -1.354110
H      0.559694      2.129501      0.005427
Rotational constants (GHz):   4.8299900      2.7898100      2.6728000
Vibrational harmonic frequencies (cm-1):
i824.6655      103.7719      162.4068
193.1827      248.8764      262.4804
377.5132      513.3527      530.2537
609.1317      731.0742      816.6889
908.9457      962.0615      1012.4920
1074.0469      1131.5601      1260.9410
1287.2751      1402.8543      1405.3228
1465.7341      1467.5952      1470.1822
1490.6052      1590.8054      1867.3679
3025.1773      3030.3544      3093.5671
3098.8674      3135.9002      3138.7398
Zero-point correction (Hartree): 0.097663

```

### c) MP2/6-311G(d,p) geometries

It is assumed that these geometries are very similar to those obtained by Cours et al.<sup>3</sup>

acetone..HO2.a

-----  
E(MP2/6-311G(d,p)) (Hartree): -343.25249079  
E(PMP2/6-311G(d,p)) (Hartree): -343.25024023  
E(PUHF/6-311G(d,p)) (Hartree): -342.24095284  
E(UHF/6-311G(d,p)) (Hartree): -342.24300381  
E(ROHF-UCCSD(T)/Aug-CC-pVDZ) (Hartree): -343.29640790  
E(ROHF-UCCSD(T)/Aug-CC-pVTZ) (Hartree): -343.59617417  
Electronic state : 2-A  
Cartesian coordinates (Angs):  
C -1.157681 -0.071982 0.010601  
O -0.333168 -0.977464 0.027319  
H 1.409419 -0.809330 0.077698  
O 2.386210 -0.689161 0.089632  
O 2.570571 0.578821 -0.145894  
C -0.766214 1.384341 0.080675  
H -0.996016 1.753156 1.086818  
H 0.299444 1.506022 -0.113213  
H -1.359750 1.972572 -0.624404  
C -2.634272 -0.378544 -0.071610  
H -3.186934 0.204831 0.670207  
H -3.002633 -0.082835 -1.059792  
H -2.803427 -1.444882 0.076234  
Rotational constants (GHz): 7.3421500 1.4865700 1.2597400  
Vibrational harmonic frequencies (cm-1):  
36.3103 57.4082 102.1431  
127.2322 141.1390 148.8962  
224.4670 392.1022 483.7271  
554.6295 688.0193 816.4790  
899.9372 929.7875 1103.3252  
1125.5749 1277.1661 1325.3393  
1404.2438 1416.9644 1482.5497  
1486.0532 1494.9277 1513.9836  
1591.8264 1770.7476 3076.4760  
3082.2163 3160.7899 3165.9196  
3210.0216 3210.4887 3470.6268  
Zero-point correction (Hartree): 0.102453

acetone

-----  
E(MP2/6-311G(d,p)) (Hartree): -192.64797184  
E(RHF/6-311G(d,p)) (Hartree): -192.01133627  
E(ROHF-UCCSD(T)/Aug-CC-pVDZ) (Hartree): -192.67795416  
E(ROHF-UCCSD(T)/Aug-CC-pVTZ) (Hartree): -192.85181362  
Electronic state : 1-A  
Cartesian coordinates (Angs):  
C 0.000000 0.186975 0.000000  
C -1.286576 -0.617677 0.002369  
C 1.286575 -0.617678 -0.002369  
H -1.258490 -1.386332 0.780487  
H -2.136138 0.047362 0.158451  
H -1.395583 -1.130105 -0.959455  
H 1.395587 -1.130099 0.959458  
H 1.258486 -1.386338 -0.780482  
H 2.136137 0.047359 -0.158460  
O 0.000001 1.403554 0.000000  
Rotational constants (GHz): 10.0553100 8.5402000 4.8985900  
Vibrational harmonic frequencies (cm-1):  
81.1628 138.7485 376.6758  
481.3098 534.3786 803.4352  
889.2178 906.2359 1091.3165  
1121.1721 1253.8614 1395.4238  
1405.8426 1482.3668 1486.2198  
1491.6076 1506.8279 1787.6709  
3075.2468 3079.9838 3158.2337  
3163.1039 3204.2506 3205.3840  
Zero-point correction (Hartree): 0.084565

CH3COHOCH3.pm

-----  
E(MP2/6-311G(d,p)) (Hartree): -343.25820354  
E(PMP2/6-311G(d,p)) (Hartree): -343.25557139  
E(PUHF/6-311G(d,p)) (Hartree): -342.23865799  
E(UHF/6-311G(d,p)) (Hartree): -342.24103052  
E(ROHF-UCCSD(T)/Aug-CC-pVDZ) (Hartree): -343.30628106  
E(ROHF-UCCSD(T)/Aug-CC-pVTZ) (Hartree): -343.60515946  
Electronic state : 2-A

Cartesian coordinates (Angs):

|   |           |           |           |
|---|-----------|-----------|-----------|
| O | 0.798269  | -0.603705 | -0.628442 |
| C | -0.365698 | 0.031881  | 0.061701  |
| O | -0.218047 | -0.118230 | 1.427800  |
| H | 0.601387  | 0.336414  | 1.655383  |
| O | 1.909483  | -0.191189 | -0.117067 |
| C | -1.549455 | -0.786058 | -0.392425 |
| H | -2.462758 | -0.361768 | 0.029198  |
| H | -1.615995 | -0.779880 | -1.482154 |
| H | -1.432741 | -1.811924 | -0.038668 |
| C | -0.389128 | 1.486541  | -0.370969 |
| H | -0.482822 | 1.564514  | -1.456321 |
| H | -1.235504 | 1.985278  | 0.106037  |
| H | 0.536479  | 1.978174  | -0.061650 |

Rotational constants (GHz): 4.8367100 3.0769600 2.9790400

Vibrational harmonic frequencies (cm-1):

|           |           |           |
|-----------|-----------|-----------|
| 126.6778  | 188.6101  | 277.4151  |
| 281.3328  | 343.2504  | 379.3878  |
| 419.3095  | 443.5107  | 507.7290  |
| 620.8358  | 762.7756  | 862.7960  |
| 956.3782  | 1017.1429 | 1034.5507 |
| 1154.9636 | 1215.7108 | 1298.6037 |
| 1331.3208 | 1399.6738 | 1427.0717 |
| 1461.8326 | 1497.2322 | 1503.2089 |
| 1521.0476 | 1525.5120 | 3088.8474 |
| 3098.0108 | 3187.9947 | 3192.5906 |
| 3200.6657 | 3202.0198 | 3847.3285 |

Zero-point correction (Hartree): 0.105651

CH3COHOCH3.pp

-----

E(MP2/6-311G(d,p)) (Hartree): -343.25505934  
 E(PMP2/6-311G(d,p)) (Hartree): -343.25526992  
 E(PUHF/6-311G(d,p)) (Hartree): -342.24085786  
 E(UHF/6-311G(d,p)) (Hartree): -342.24065321  
 E(ROHF-UCCSD(T)/Aug-CC-pVDZ) (Hartree): -343.30287446  
 E(ROHF-UCCSD(T)/Aug-CC-pVTZ) (Hartree): -343.60168759

Electronic state : 2-A

Cartesian coordinates (Angs):

|   |           |           |           |
|---|-----------|-----------|-----------|
| O | -0.818712 | -0.686359 | -0.486939 |
| C | 0.350797  | 0.046176  | 0.050272  |
| O | 0.355599  | -0.038728 | 1.436779  |
| O | -1.945878 | -0.178390 | -0.087463 |
| H | 0.508007  | -0.961524 | 1.664254  |
| C | 1.517001  | -0.685076 | -0.586325 |
| H | 1.481704  | -0.603993 | -1.674514 |
| H | 2.448860  | -0.251385 | -0.218633 |
| H | 1.485506  | -1.745342 | -0.316309 |
| C | 0.245905  | 1.507607  | -0.320406 |
| H | 1.137121  | 2.029902  | 0.032999  |
| H | 0.165174  | 1.613859  | -1.403874 |
| H | -0.636669 | 1.934061  | 0.155821  |

Rotational constants (GHz): 4.7815100 3.0650300 2.9433600

Vibrational harmonic frequencies (cm-1):

|           |           |           |
|-----------|-----------|-----------|
| 126.8977  | 210.3841  | 259.1534  |
| 286.2897  | 336.0838  | 386.4411  |
| 419.9500  | 433.4826  | 498.8899  |
| 620.4266  | 775.4435  | 869.3244  |
| 956.5451  | 1021.0255 | 1026.2001 |
| 1169.8165 | 1200.4270 | 1264.3853 |
| 1305.1941 | 1393.2663 | 1432.9035 |
| 1450.9496 | 1497.2536 | 1503.8040 |
| 1516.3274 | 1524.8989 | 3084.6641 |
| 3101.6047 | 3177.5470 | 3196.1935 |
| 3201.6052 | 3215.3240 | 3867.3386 |

Zero-point correction (Hartree): 0.105548

CH3COHOCH3.pt

-----

E(MP2/6-311G(d,p)) (Hartree): -343.25570802  
 E(PMP2/6-311G(d,p)) (Hartree): -343.25449473  
 E(PUHF/6-311G(d,p)) (Hartree): -342.23781873  
 E(UHF/6-311G(d,p)) (Hartree): -342.23896078  
 E(ROHF-UCCSD(T)/Aug-CC-pVDZ) (Hartree): -343.30347952  
 E(ROHF-UCCSD(T)/Aug-CC-pVTZ) (Hartree): -343.60260978

Electronic state : 2-A

Cartesian coordinates (Angs):

|   |          |           |           |
|---|----------|-----------|-----------|
| O | 0.889921 | -0.045915 | -0.779515 |
|---|----------|-----------|-----------|

|                                                               |                 |                 |           |
|---------------------------------------------------------------|-----------------|-----------------|-----------|
| C                                                             | -0.383277       | 0.008306        | -0.005975 |
| O                                                             | -1.366727       | -0.051112       | -0.980304 |
| O                                                             | 1.932622        | 0.003074        | -0.015972 |
| H                                                             | -1.366238       | -0.946458       | -1.333403 |
| C                                                             | -0.405570       | -1.182277       | 0.931889  |
| H                                                             | 0.414113        | -1.122216       | 1.647790  |
| H                                                             | -1.360186       | -1.199019       | 1.462000  |
| H                                                             | -0.298386       | -2.107439       | 0.356347  |
| C                                                             | -0.469880       | 1.355218        | 0.671664  |
| H                                                             | -0.449838       | 2.135657        | -0.091465 |
| H                                                             | -1.406796       | 1.420007        | 1.228826  |
| H                                                             | 0.373170        | 1.483617        | 1.350767  |
| Rotational constants (GHz): 4.7369700 3.0501700 2.9602200     |                 |                 |           |
| Vibrational harmonic frequencies (cm-1):                      |                 |                 |           |
| 139.6752                                                      | 227.6163        | 276.3880        |           |
| 281.9739                                                      | 362.8107        | 370.0655        |           |
| 381.6035                                                      | 478.4310        | 499.7908        |           |
| 552.8900                                                      | 769.6509        | 895.0652        |           |
| 956.8133                                                      | 1017.8523       | 1040.3449       |           |
| 1167.7543                                                     | 1195.4347       | 1314.6683       |           |
| 1326.8785                                                     | 1392.4488       | 1427.0817       |           |
| 1450.4453                                                     | 1494.3030       | 1506.2460       |           |
| 1518.7576                                                     | 1525.7392       | 3084.4757       |           |
| 3099.4063                                                     | 3177.6863       | 3197.0242       |           |
| 3209.4217                                                     | 3213.9591       | 3869.7092       |           |
| Zero-point correction (Hartree): 0.105758                     |                 |                 |           |
| HO2                                                           |                 |                 |           |
| ---                                                           |                 |                 |           |
| E(MP2/6-311G(d,p)) (Hartree): -150.58562573                   |                 |                 |           |
| E(PMP2/6-311G(d,p)) (Hartree): -150.58575053                  |                 |                 |           |
| E(PUHF/6-311G(d,p)) (Hartree): -150.22876738                  |                 |                 |           |
| E(UHF/6-311G(d,p)) (Hartree): -150.21815617                   |                 |                 |           |
| E(ROHF-UCCSD(T)/Aug-CC-pVDZ) (Hartree): -150.59979291         |                 |                 |           |
| E(ROHF-UCCSD(T)/Aug-CC-pVTZ) (Hartree): -150.72607396         |                 |                 |           |
| E(ROHF-UCCSD(T)/Aug-CC-pVQZ) (Hartree): -150.76507326         |                 |                 |           |
| Point group : CS                                              |                 |                 |           |
| Electronic state : 2-A"                                       |                 |                 |           |
| Cartesian coordinates (Angs):                                 |                 |                 |           |
| O                                                             | 0.055112        | 0.707966        | 0.000000  |
| O                                                             | 0.055112        | -0.601638       | 0.000000  |
| H                                                             | -0.881790       | -0.850623       | 0.000000  |
| Rotational constants (GHz): 625.7031900 34.7001900 32.8769000 |                 |                 |           |
| Vibrational harmonic frequencies (cm-1):                      |                 |                 |           |
| 1245.4808 ( A')                                               | 1460.1293 ( A') | 3736.5745 ( A') |           |
| Zero-point correction (Hartree): 0.014676                     |                 |                 |           |
| TSa                                                           |                 |                 |           |
| ---                                                           |                 |                 |           |
| E(MP2/6-311G(d,p)) (Hartree): -343.23906838                   |                 |                 |           |
| E(PMP2/6-311G(d,p)) (Hartree): -343.23757234                  |                 |                 |           |
| E(PUHF/6-311G(d,p)) (Hartree): -342.19707730                  |                 |                 |           |
| E(UHF/6-311G(d,p)) (Hartree): -342.19887450                   |                 |                 |           |
| E(ROHF-UCCSD(T)/Aug-CC-pVDZ) (Hartree): -343.28294401         |                 |                 |           |
| E(ROHF-UCCSD(T)/Aug-CC-pVTZ) (Hartree): -343.58258185         |                 |                 |           |
| Electronic state : 2-A                                        |                 |                 |           |
| Cartesian coordinates (Angs):                                 |                 |                 |           |
| C                                                             | -0.583181       | 0.000000        | 0.230253  |
| O                                                             | 0.025962        | 0.000000        | 1.339362  |
| O                                                             | 1.072493        | 0.000000        | -0.907590 |
| O                                                             | 1.938671        | 0.000000        | 0.018795  |
| H                                                             | 1.260811        | 0.000000        | 0.894946  |
| C                                                             | -1.173158       | 1.287363        | -0.289302 |
| H                                                             | -1.275985       | 1.270704        | -1.375991 |
| H                                                             | -2.167392       | 1.412579        | 0.154940  |
| H                                                             | -0.547045       | 2.126724        | 0.016366  |
| C                                                             | -1.173158       | -1.287363       | -0.289302 |
| H                                                             | -2.167392       | -1.412579       | 0.154940  |
| H                                                             | -1.275985       | -1.270704       | -1.375991 |
| H                                                             | -0.547045       | -2.126724       | 0.016366  |
| Rotational constants (GHz): 4.8069200 2.8190400 2.7101700     |                 |                 |           |
| Vibrational harmonic frequencies (cm-1):                      |                 |                 |           |
| i739.6011                                                     | 113.3297        | 177.6714        |           |
| 224.6494                                                      | 253.8280        | 272.6015        |           |
| 381.5440                                                      | 525.4329        | 599.5356        |           |
| 628.9574                                                      | 830.6925        | 917.1663        |           |
| 944.2011                                                      | 967.6607        | 1038.4168       |           |
| 1089.3201                                                     | 1196.1901       | 1288.5844       |           |

|           |           |           |
|-----------|-----------|-----------|
| 1410.7207 | 1421.2476 | 1484.3333 |
| 1487.7291 | 1491.2681 | 1505.8622 |
| 1629.4178 | 1720.9232 | 1944.6962 |
| 3076.5809 | 3080.2239 | 3166.2807 |
| 3170.3578 | 3201.5703 | 3204.7693 |

Zero-point correction (Hartree): 0.101255
