# Supplementary material for: Does acetone react with HO 2 in the upper-troposphere?
Source: Copernicus journal article supplement (doi:10.5194/acp-12-1339-2012), 2012-02-02
Supplement: Supplementary file 1 [file acp-12-1339-2012-supplement.zip › supp_emac.pdf]

# Complete figures set

**T. Dillon<sup>1</sup>, A.Pozzer<sup>1,2,\*</sup> J. Crowley<sup>1</sup>,  
L. Vereecken<sup>1</sup>, J. Lelieveld<sup>1,2,3</sup>**

1 Air Chemistry Department, Max-Planck Institute of Chemistry, PO Box 3060,  
55020 Mainz, Germany

2 EEWRC, The Cyprus Institute, 20 Kavafi Street, 1645 Nicosia, Cyprus

3 King Saud University, Riyadh, Saudi Arabia

\* Now at: Int. Center for Theoretical Physics, Physics of Weather and Climate  
Section, Strada Costiera 11, 34100 Trieste, Italy

`terry.dillon@mpic.de`

## Model-observation comparison

### Acetic acid ( $CH_3C(O)OH$ )

Vertical profiles of  $CH_3C(O)OH$  (in pmol/mol) for PEM-Tropics-A campaign from Emmons et al. (2000). Asterisks and boxes represent the average and the standard deviation (with respect to space and time) of the measurements in the region, respectively. The simulated average is indicated by the solid line and the corresponding simulated standard deviation with respect to time and space by the dashed lines. On the right axis the numbers of measurements are listed. The blue lines represent results from simulation *SR1*, the red lines from simulation *SR2* and the green lines from simulation *S1*.

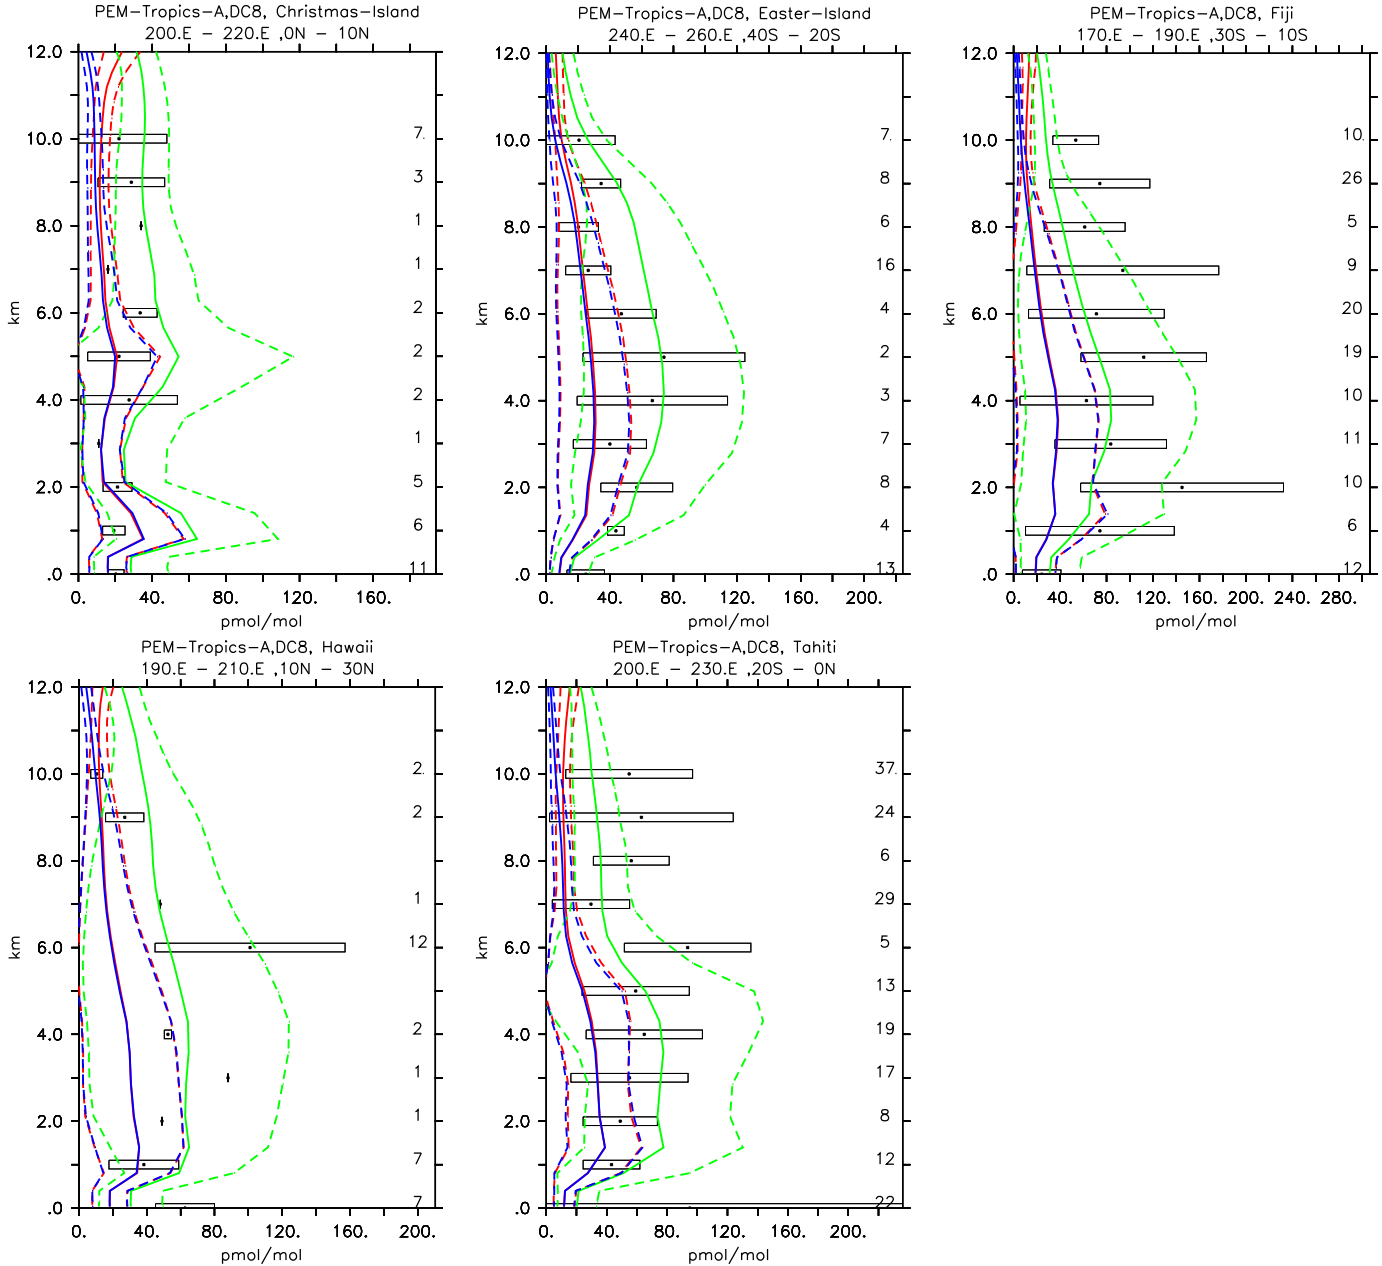

## Nitrogen Oxide ( $NO$ )

Vertical profiles of  $NO$  (in pmol/mol) for PEM-Tropic-A campaign from Emmons et al. (2000). Asterisks and boxes represent the average and the standard deviation (with respect to space and time) of the measurements in the region, respectively. The simulated average is indicated by the solid line and the corresponding simulated standard deviation with respect to time and space by the dashed lines. On the right axis the numbers of measurements are listed. The blue lines represent results from simulation *SR1*, the red lines from simulation *SR2* and the green lines from simulation *S1*.

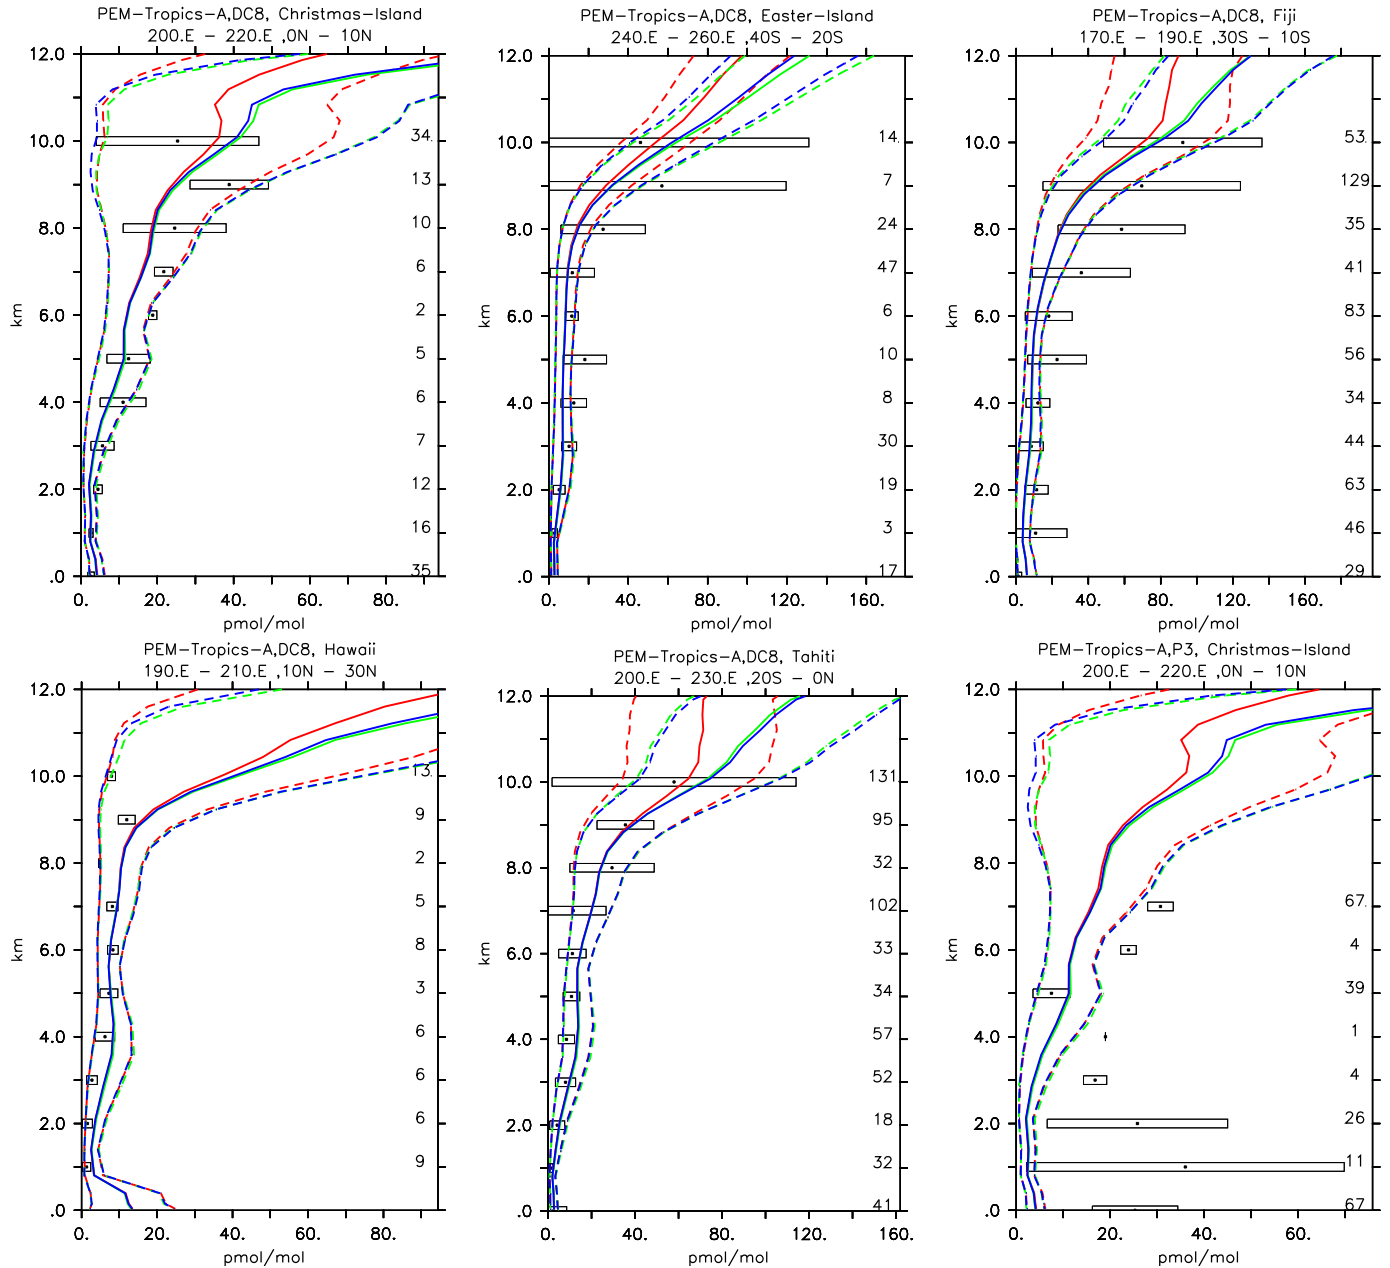

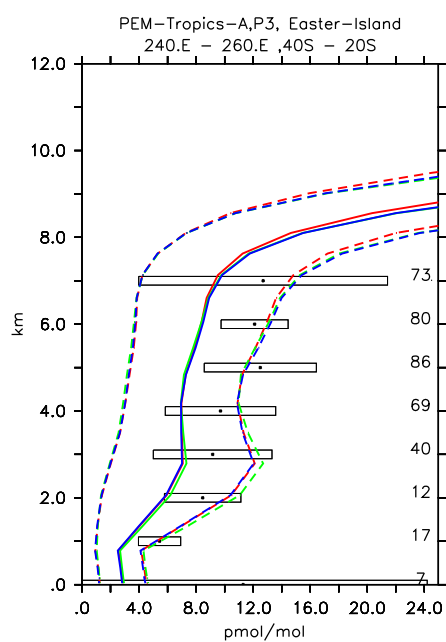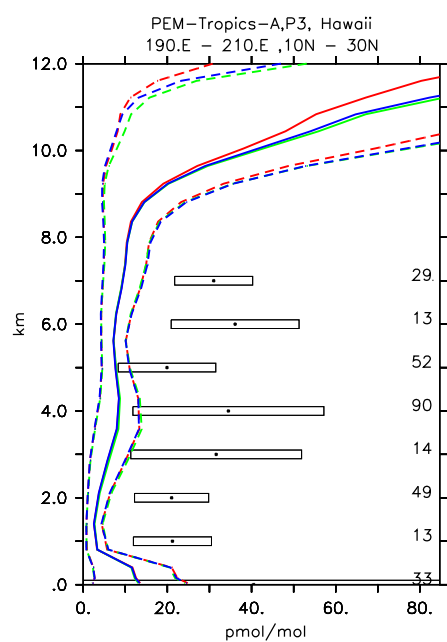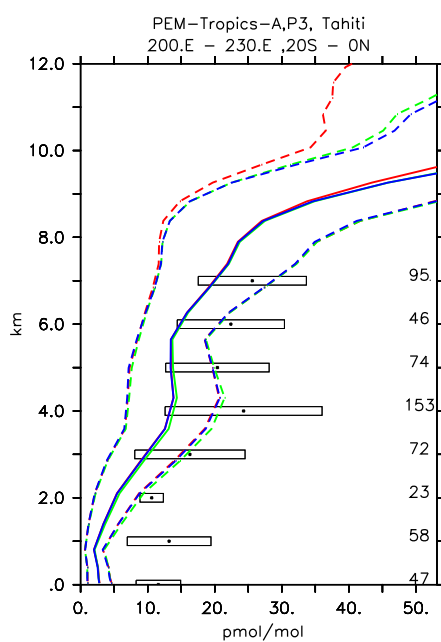

## Peroxyacyl nitrates (*PAN*)

Vertical profiles of *PAN* (in pmol/mol) for PEM-Tropic-A campaign from Emmons et al. (2000). Asterisks and boxes represent the average and the standard deviation (with respect to space and time) of the measurements in the region, respectively. The simulated average is indicated by the solid line and the corresponding simulated standard deviation with respect to time and space by the dashed lines. On the right axis the numbers of measurements are listed. The blue lines represent results from simulation *SR1*, the red lines from simulation *SR2* and the green lines from simulation *S1*.

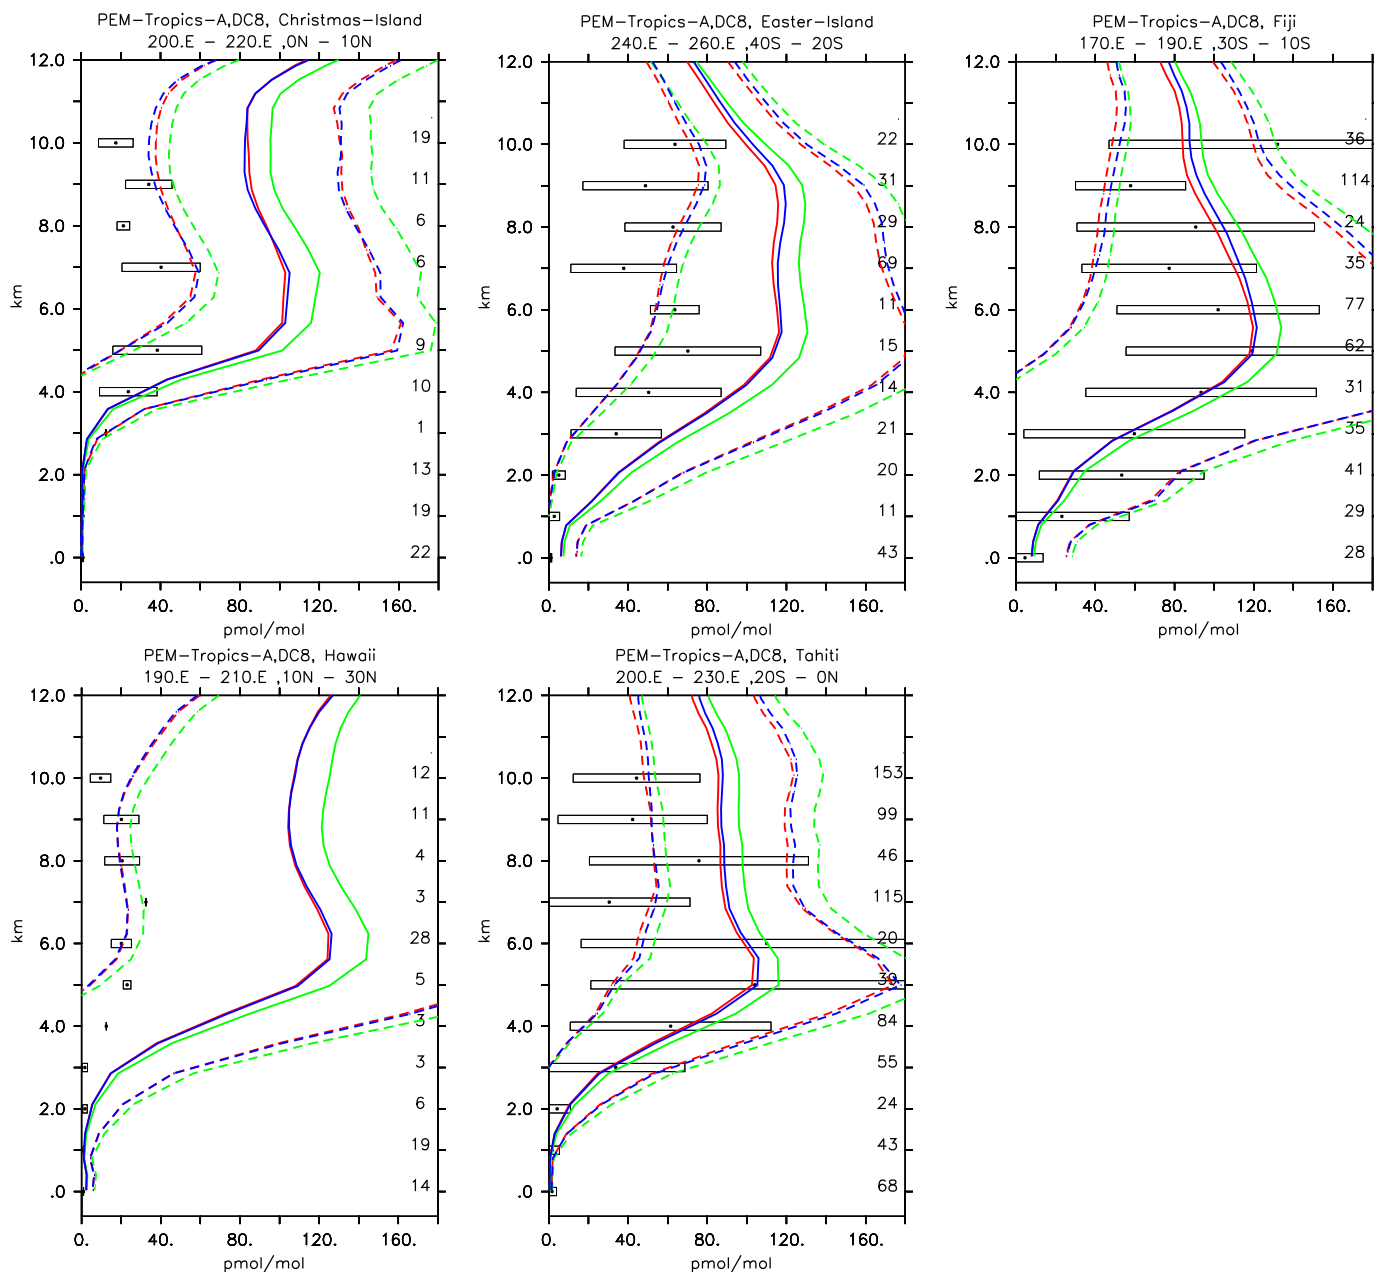

## References

Emmons, L. K., Hauglustaine, D. A., Müller, J.-F., Carroll, M. A., Brasseur, G. P., Brunner, D., Staehelin, J., Thouret, V., and Marenco, A.: Data composites of airborne observations of tropospheric ozone and its precursors, *J. Geophys. Res.*, 105, 20 497–20 538, 2000.
